## Confusion matrices and True Skill Statistics scores for the SDM evaluation

### Hypervolume pre-1950s

|              |          | <i>Validation dataset</i> |         |
|--------------|----------|---------------------------|---------|
|              |          | Presence                  | Absence |
| <i>Model</i> | Presence | 64                        | 227     |
|              | Absence  | 8                         | 98      |

**Total Random points = 325**

**TSS = 0.6**

### Hypervolume 1950s

|              |          | <i>Validation dataset</i> |         |
|--------------|----------|---------------------------|---------|
|              |          | Presence                  | Absence |
| <i>Model</i> | Presence | 69                        | 307     |
|              | Absence  | 17                        | 82      |

**Total Random points = 389**

**TSS = 0.6**

### Hypervolume 1960s

|              |          | <i>Validation dataset</i> |         |
|--------------|----------|---------------------------|---------|
|              |          | Presence                  | Absence |
| <i>Model</i> | Presence | 180                       | 634     |
|              | Absence  | 8                         | 216     |

**Total Random points = 850**

**TSS = 0.6**

### Hypervolume 1970s

|              |          | <i>Validation dataset</i> |         |
|--------------|----------|---------------------------|---------|
|              |          | Presence                  | Absence |
| <i>Model</i> | Presence | 270                       | 898     |
|              | Absence  | 14                        | 386     |

**Total Random points = 1284**

**TSS = 0.6**

### Hypervolume 1980s

#### *Validation dataset*

|              |          | Presence | Absence |
|--------------|----------|----------|---------|
| <i>Model</i> | Presence | 405      | 1375    |
|              | Absence  | 22       | 555     |

**Total Random points = 1930**

**TSS = 0.6**

### Hypervolume 1990s

#### *Validation dataset*

|              |          | Presence | Absence |
|--------------|----------|----------|---------|
| <i>Model</i> | Presence | 566      | 1850    |
|              | Absence  | 27       | 831     |

**Total Random points = 2681**

**TSS = 0.6**

### Hypervolume 2000s

#### *Validation dataset*

|              |          | Presence | Absence |
|--------------|----------|----------|---------|
| <i>Model</i> | Presence | 862      | 3001    |
|              | Absence  | 26       | 1013    |

**Total Random points = 4014**

**TSS = 0.7**

### Hypervolume 2010s

#### *Validation dataset*

|              |          | Presence | Absence |
|--------------|----------|----------|---------|
| <i>Model</i> | Presence | 1063     | 3421    |
|              | Absence  | 43       | 1579    |

**Total Random points = 5000**

**TSS = 0.7**
